# Supplementary material
Source: publisher figshare collection journal article supplement (https://geolsoc.figshare.com/ndownloader/files/24635024)
Supplement: Supplementary file 1 [file 24635024]

## Sheet: Analytical details
Samples AR-1-6A, BJ-1-10, SRD-1-2 and PRD-1-2A were prepared as polished thin sections and coated with 20 – 25 nm of carbon. Electron Microprobe analysis of these samples were done with a MICROSCAN MK5 Cambridge Scientific Instruments Ltd. Instrument conditions are: Accelerating voltage 15 KV Take off angle 75 degrees Probe current approx 3.0 nA (approx. 2.2 nA on Cobalt Standard) Beam diameter d…
Samples MA-1-5M was prepared as epoxy block, carbon coated (25 nm) and analysed with a Cameca SX100 electron microprobe with major elements measured using four wavelength-dispersive detectors. The machine was calibrated against a Glass Rhyolite NMNH-72854_VG-568 standard of known composition before the analyses. Multiple analyses were performed on the standard and on the samples. The overall anal…

## Sheet: Standard NMNH-72854_VG-568 
Standard	Weight%												Atomic%													Oxide
N°	Si	Mg	Na	Al	Fe	Mn	K	Ti	Ca	Cr	O	Total	Si	Mg	Na	Al	Fe	Mn	K	Ti	Ca	Cr	O	Total		SiO2	MgO	Na2O	Al2O3	FeO	MnO	K2O	TiO2	CaO	Cr2O3	Total
1	35.98	0	2.75	6.42	0.82	-0.01	3.96	0.04	0.36	0	48.86	99.17	26.59	0	2.48	4.94	0.31	0	2.1	0.02	0.18	0	63.39	100		76.96	-0.01	3.71	12.12	1.06	-0.01	4.77	0.07	0.5	-0.01	99.19
2	36.34	0.01	2.28	6.39	0.82	-0.02	3.81	0.07	0.34	0.04	49.1	99.19	26.83	0.01	2.06	4.92	0.31	-0.01	2.02	0.03	0.17	0.02	63.64	100		77.74	0.02	3.08	12.08	1.06	-0.02	4.59	0.11	0.47	0.06	99.21
3	36.23	0.02	2.78	6.37	0.75	0.03	3.94	0.06	0.28	0.04	49.13	99.62	26.64	0.01	2.5	4.88	0.28	0.01	2.08	0.03	0.14	0.02	63.41	100		77.51	0.03	3.75	12.04	0.97	0.03	4.74	0.11	0.39	0.06	99.62
4	36.32	0.03	2.73	6.35	0.86	-0.03	3.89	0.06	0.3	0	49.2	99.72	26.68	0.03	2.45	4.86	0.32	-0.01	2.05	0.03	0.16	0	63.44	100		77.71	0.05	3.68	12	1.11	-0.04	4.69	0.1	0.42	0	99.76
5	36.33	0.02	2.71	6.42	0.8	0.02	3.96	0.05	0.27	0.01	49.24	99.83	26.66	0.01	2.43	4.9	0.29	0.01	2.09	0.02	0.14	0	63.44	100		77.71	0.03	3.66	12.12	1.03	0.03	4.78	0.08	0.37	0.02	99.83
6	36.32	0.01	2.78	6.39	0.87	0.03	3.92	0.05	0.28	0	49.25	99.9	26.64	0	2.49	4.88	0.32	0.01	2.06	0.02	0.15	0	63.41	100		77.7	0.01	3.75	12.08	1.12	0.04	4.72	0.08	0.4	0	99.9
7	36.2	0.02	2.79	6.42	0.96	0.03	3.95	0.05	0.28	0.03	49.19	99.92	26.57	0.02	2.5	4.91	0.35	0.01	2.08	0.02	0.14	0.01	63.38	100		77.44	0.04	3.76	12.14	1.23	0.04	4.76	0.09	0.39	0.04	99.92
8	36.28	0.01	2.7	6.49	0.89	0.01	3.94	0.05	0.3	-0.02	49.27	99.94	26.61	0.01	2.42	4.96	0.33	0	2.08	0.02	0.15	-0.01	63.43	100		77.61	0.02	3.64	12.27	1.14	0.01	4.75	0.09	0.42	-0.02	99.96
9	36.3	0.03	2.75	6.43	0.89	0.04	3.87	0.06	0.34	-0.03	49.27	99.94	26.62	0.03	2.46	4.91	0.33	0.01	2.04	0.02	0.18	-0.01	63.42	100		77.66	0.05	3.7	12.15	1.14	0.05	4.67	0.09	0.48	-0.04	99.98
10	36.21	0.04	2.82	6.46	0.93	0.03	3.89	0.04	0.31	0.02	49.24	99.99	26.55	0.03	2.53	4.93	0.34	0.01	2.05	0.02	0.16	0.01	63.37	100		77.48	0.06	3.8	12.2	1.19	0.04	4.69	0.07	0.44	0.03	99.99
11	36.32	0.01	2.75	6.43	0.89	0.03	3.91	0.05	0.36	0.04	49.32	100.1	26.6	0.01	2.46	4.9	0.33	0.01	2.05	0.02	0.18	0.01	63.41	100		77.7	0.02	3.71	12.15	1.14	0.04	4.7	0.09	0.5	0.05	100.1
12	36.37	0	2.76	6.44	0.9	-0.02	3.97	0.04	0.37	0.02	49.38	100.23	26.6	0	2.47	4.91	0.33	-0.01	2.08	0.02	0.19	0.01	63.4	100		77.81	0	3.72	12.18	1.16	-0.02	4.78	0.07	0.52	0.02	100.26
13	36.55	0	2.74	6.42	0.87	0.01	3.89	0.03	0.32	0.04	49.52	100.39	26.68	0	2.44	4.87	0.32	0	2.04	0.01	0.16	0.02	63.45	100		78.19	0	3.69	12.12	1.12	0.01	4.69	0.06	0.45	0.06	100.4

## Sheet: AR-1-6A
Glass AR-1-6A
ELMT	ZAF	%ELMT	ATOM.%		%OXIDE
SiK: 1	0.967	34.282	26.545	Si1O2	73.337
TiK: 1	0.897	0.103	0.047	Ti1O2	0.172
AlK: 1	0.969	5.981	4.822	Al2O3	11.302
CrK: 1	0.887	0.013	0.005	Cr2O3	0.018
FeK: 1	0.817	1.208	0.471	Fe1O1	1.554
MnK: 1	0.806	0.042	0.017	Mn1O1	0.054
MgK: 1	0.92	0	0	Mg1O1	0
CaK: 1	0.961	0.409	0.222	Ca1O1	0.573
NaK: 1	0.946	1.832	1.733	Na2O1	2.469
K K: 1	0.992	4.958	2.758	K 2O1	5.973
O K: 1	0	46.624	63.38
TOTAL		95.453	100		95.453
CIA					55.6283
-------	------	---------	--------	--------	-------
ELMT	ZAF	%ELMT	ATOM.%		%OXIDE
SiK: 1	0.967	34.535	26.649	Si1O2	73.877
TiK: 1	0.897	0.158	0.072	Ti1O2	0.264
AlK: 1	0.969	5.98	4.804	Al2O3	11.3
CrK: 1	0.888	0	0	Cr2O3	0
FeK: 1	0.817	1.258	0.488	Fe1O1	1.619
MnK: 1	0.805	0.003	0.001	Mn1O1	0.003
MgK: 1	0.921	0	0	Mg1O1	0
CaK: 1	0.961	0.42	0.227	Ca1O1	0.588
NaK: 1	0.946	1.779	1.678	Na2O1	2.399
K K: 1	0.992	4.663	2.585	K 2O1	5.617
O K: 1	0	46.87	63.496
TOTAL		95.666	100		95.666
CIA					56.7725
-------	------	---------	--------	--------	-------
ELMT	ZAF	%ELMT	ATOM.%		%OXIDE
SiK: 1	0.968	34.441	26.647	Si1O2	73.677
TiK: 1	0.897	0.219	0.099	Ti1O2	0.365
AlK: 1	0.97	5.969	4.809	Al2O3	11.28
CrK: 1	0.887	0	0	Cr2O3	0
FeK: 1	0.817	0.993	0.386	Fe1O1	1.277
MnK: 1	0.805	0.059	0.023	Mn1O1	0.077
MgK: 1	0.922	0	0	Mg1O1	0
CaK: 1	0.96	0.326	0.177	Ca1O1	0.456
NaK: 1	0.948	1.72	1.626	Na2O1	2.319
K K: 1	0.992	4.95	2.751	K 2O1	5.963
O K: 1	0	46.735	63.481
TOTAL		95.413	100		95.413
CIA					56.3493
-------	------	---------	--------	--------	-------
ELMT	ZAF	%ELMT	ATOM.%		%OXIDE
SiK: 1	0.967	34.313	26.504	Si1O2	73.402
TiK: 1	0.897	0.133	0.06	Ti1O2	0.221
AlK: 1	0.971	6.189	4.977	Al2O3	11.694
CrK: 1	0.887	0.038	0.016	Cr2O3	0.055
FeK: 1	0.817	1.015	0.394	Fe1O1	1.306
MnK: 1	0.805	0.014	0.006	Mn1O1	0.019
MgK: 1	0.924	0.057	0.051	Mg1O1	0.095
CaK: 1	0.96	0.436	0.236	Ca1O1	0.61
NaK: 1	0.947	1.477	1.394	Na2O1	1.991
K K: 1	0.992	5.241	2.908	K 2O1	6.313
O K: 1	0	46.793	63.454
TOTAL		95.705	100		95.705
CIA					56.745
-------	------	---------	--------	--------	-------
ELMT	ZAF	%ELMT	ATOM.%		%OXIDE
SiK: 1	0.968	34.521	26.735	Si1O2	73.847
TiK: 1	0.897	0.108	0.049	Ti1O2	0.18
AlK: 1	0.969	5.853	4.72	Al2O3	11.06
CrK: 1	0.887	0	0	Cr2O3	0
FeK: 1	0.817	1.206	0.47	Fe1O1	1.552
MnK: 1	0.805	0.017	0.007	Mn1O1	0.022
MgK: 1	0.921	0	0	Mg1O1	0
CaK: 1	0.961	0.419	0.228	Ca1O1	0.586
NaK: 1	0.946	1.71	1.618	Na2O1	2.305
K K: 1	0.992	4.808	2.675	K 2O1	5.791
O K: 1	0	46.701	63.499
TOTAL		95.343	100		95.343
CIA					56.0227
-------	------	---------	--------	--------	-------
ELMT	ZAF	%ELMT	ATOM.%		%OXIDE
SiK: 1	0.965	33.7	26.241	Si1O2	72.092
TiK: 1	0.898	0.249	0.114	Ti1O2	0.415
AlK: 1	0.968	6.221	5.043	Al2O3	11.755
CrK: 1	0.888	0	0	Cr2O3	0
FeK: 1	0.817	1.393	0.546	Fe1O1	1.792
MnK: 1	0.806	0	0	Mn1O1	0
MgK: 1	0.92	0.016	0.014	Mg1O1	0.027
CaK: 1	0.961	0.526	0.287	Ca1O1	0.736
NaK: 1	0.943	1.61	1.532	Na2O1	2.171
K K: 1	0.993	5.169	2.891	K 2O1	6.226
O K: 1	0	46.329	63.332
TOTAL		95.214	100		95.214
CIA					56.2763
-------	------	---------	--------	--------	-------
ELMT	ZAF	%ELMT	ATOM.%		%OXIDE
SiK: 1	0.967	34.64	26.608	Si1O2	74.102
TiK: 1	0.897	0.148	0.067	Ti1O2	0.247
AlK: 1	0.97	6.105	4.883	Al2O3	11.536
CrK: 1	0.886	0	0	Cr2O3	0
FeK: 1	0.816	0.948	0.366	Fe1O1	1.219
MnK: 1	0.805	0.025	0.01	Mn1O1	0.032
MgK: 1	0.922	0	0	Mg1O1	0
CaK: 1	0.96	0.38	0.205	Ca1O1	0.532
NaK: 1	0.95	1.892	1.776	Na2O1	2.551
K K: 1	0.991	4.764	2.629	K 2O1	5.739
O K: 1	0	47.056	63.457
TOTAL		95.959	100		95.959
CIA					56.6657
-------	------	---------	--------	--------	-------
ELMT	ZAF	%ELMT	ATOM.%		%OXIDE
SiK: 1	0.966	34.373	26.583	Si1O2	73.53
TiK: 1	0.897	0.167	0.076	Ti1O2	0.279
AlK: 1	0.969	6.103	4.914	Al2O3	11.532
CrK: 1	0.887	0.006	0.002	Cr2O3	0.008
FeK: 1	0.816	1.115	0.434	Fe1O1	1.435
MnK: 1	0.805	0	0	Mn1O1	0
MgK: 1	0.921	0	0	Mg1O1	0
CaK: 1	0.961	0.382	0.207	Ca1O1	0.534
NaK: 1	0.948	1.934	1.827	Na2O1	2.607
K K: 1	0.991	4.453	2.474	K 2O1	5.364
O K: 1	0	46.756	63.483
TOTAL		95.288	100		95.288
CIA					57.5535
-------	------	---------	--------	--------	-------
ELMT	ZAF	%ELMT	ATOM.%		%OXIDE
SiK: 1	0.966	34.709	26.602	Si1O2	74.249
TiK: 1	0.898	0.165	0.074	Ti1O2	0.275
AlK: 1	0.968	6.118	4.882	Al2O3	11.561
CrK: 1	0.888	0	0	Cr2O3	0
FeK: 1	0.817	1.295	0.499	Fe1O1	1.666
MnK: 1	0.805	0	0	Mn1O1	0
MgK: 1	0.92	0.021	0.019	Mg1O1	0.035
CaK: 1	0.961	0.365	0.196	Ca1O1	0.51
NaK: 1	0.946	1.874	1.755	Na2O1	2.527
K K: 1	0.991	4.489	2.472	K 2O1	5.407
O K: 1	0	47.194	63.502
TOTAL		96.23	100		96.23
CIA					57.7906
-------	------	---------	--------	--------	-------
ELMT	ZAF	%ELMT	ATOM.%		%OXIDE
SiK: 1	0.968	34.375	26.518	Si1O2	73.534
TiK: 1	0.897	0.18	0.082	Ti1O2	0.301
AlK: 1	0.971	6.085	4.887	Al2O3	11.498
CrK: 1	0.887	0.03	0.013	Cr2O3	0.044
FeK: 1	0.817	1.161	0.451	Fe1O1	1.494
MnK: 1	0.806	0.037	0.015	Mn1O1	0.048
MgK: 1	0.924	0.016	0.014	Mg1O1	0.026
CaK: 1	0.96	0.472	0.255	Ca1O1	0.66
NaK: 1	0.944	1.325	1.248	Na2O1	1.785
K K: 1	0.993	5.546	3.074	K 2O1	6.681
O K: 1	0	46.844	63.444
TOTAL		96.071	100		96.071
					55.7506
-------	------	---------	--------	--------	-------
ELMT	ZAF	%ELMT	ATOM.%		%OXIDE
SiK: 1	0.966	34.345	26.624	Si1O2	73.47
TiK: 1	0.898	0.158	0.072	Ti1O2	0.264
AlK: 1	0.968	5.921	4.779	Al2O3	11.189
CrK: 1	0.887	0	0	Cr2O3	0
FeK: 1	0.817	1.084	0.423	Fe1O1	1.395
MnK: 1	0.805	0.163	0.064	Mn1O1	0.21
MgK: 1	0.92	0.053	0.047	Mg1O1	0.087
CaK: 1	0.961	0.446	0.242	Ca1O1	0.624
NaK: 1	0.947	1.904	1.804	Na2O1	2.567
K K: 1	0.991	4.435	2.47	K 2O1	5.342
O K: 1	0	46.639	63.475
TOTAL		95.147	100		95.147
CIA					56.7336
-------	------	---------	--------	--------	-------
ELMT	ZAF	%ELMT	ATOM.%		%OXIDE
SiK: 1	0.967	34.296	26.506	Si1O2	73.366
TiK: 1	0.897	0.164	0.074	Ti1O2	0.274
AlK: 1	0.97	6.119	4.923	Al2O3	11.562
CrK: 1	0.887	0	0	Cr2O3	0
FeK: 1	0.817	1.056	0.41	Fe1O1	1.359
MnK: 1	0.805	0.018	0.007	Mn1O1	0.024
MgK: 1	0.923	0	0	Mg1O1	0
CaK: 1	0.96	0.39	0.211	Ca1O1	0.546
NaK: 1	0.947	1.652	1.56	Na2O1	2.227
K K: 1	0.992	5.227	2.902	K 2O1	6.296
O K: 1	0	46.73	63.405
TOTAL		95.652	100		95.652
CIA					56.0419
-------	------	---------	--------	--------	-------
Glass AR-1-6A Brown
ELMT	ZAF	%ELMT	ATOM.%		%OXIDE
SiK: 1	0.963	33.359	25.845	Si1O2	71.362
TiK: 1	0.9	0.27	0.123	Ti1O2	0.451
AlK: 1	0.964	6.299	5.081	Al2O3	11.902
CrK: 1	0.891	0.011	0.005	Cr2O3	0.016
FeK: 1	0.818	1.943	0.757	Fe1O1	2.499
MnK: 1	0.807	0.09	0.036	Mn1O1	0.116
MgK: 1	0.914	0.06	0.054	Mg1O1	0.1
CaK: 1	0.963	0.645	0.35	Ca1O1	0.903
NaK: 1	0.937	1.886	1.786	Na2O1	2.543
K K: 1	0.995	5.164	2.874	K 2O1	6.22
O K: 1	0	46.385	63.09
TOTAL		96.113	100		96.113
CIA					55.1836
-------	------	---------	--------	--------	-------
ELMT	ZAF	%ELMT	ATOM.%		%OXIDE
SiK: 1	0.965	33.274	25.974	Si1O2	71.179
TiK: 1	0.899	0.289	0.132	Ti1O2	0.483
AlK: 1	0.966	6.096	4.954	Al2O3	11.518
CrK: 1	0.89	0.067	0.028	Cr2O3	0.097
FeK: 1	0.818	1.615	0.634	Fe1O1	2.078
MnK: 1	0.807	0	0	Mn1O1	0
MgK: 1	0.918	0.108	0.098	Mg1O1	0.18
CaK: 1	0.962	0.711	0.389	Ca1O1	0.994
NaK: 1	0.939	1.592	1.518	Na2O1	2.146
K K: 1	0.995	5.595	3.138	K 2O1	6.74
O K: 1	0	46.068	63.135
TOTAL		95.414	100		95.415
CIA					53.8275
-------	------	---------	--------	--------	-------
ELMT	ZAF	%ELMT	ATOM.%		%OXIDE
SiK: 1	0.964	33.597	26.164	Si1O2	71.87
TiK: 1	0.899	0.241	0.11	Ti1O2	0.402
AlK: 1	0.965	6.141	4.979	Al2O3	11.603
CrK: 1	0.89	0.025	0.011	Cr2O3	0.037
FeK: 1	0.818	1.684	0.66	Fe1O1	2.167
MnK: 1	0.806	0	0	Mn1O1	0
MgK: 1	0.917	0.085	0.077	Mg1O1	0.141
CaK: 1	0.963	0.641	0.35	Ca1O1	0.897
NaK: 1	0.94	1.812	1.724	Na2O1	2.442
K K: 1	0.994	4.7	2.63	K 2O1	5.662
O K: 1	0	46.295	63.296
TOTAL		95.22	100		95.22
CIA					56.3143
-------	------	---------	--------	--------	-------
ELMT	ZAF	%ELMT	ATOM.%		%OXIDE
SiK: 1	0.964	33.487	26.098	Si1O2	71.636
TiK: 1	0.899	0.24	0.11	Ti1O2	0.401
AlK: 1	0.965	6.201	5.031	Al2O3	11.717
CrK: 1	0.889	0.016	0.007	Cr2O3	0.023
FeK: 1	0.818	1.648	0.646	Fe1O1	2.12
MnK: 1	0.806	0.004	0.002	Mn1O1	0.005
MgK: 1	0.917	0.05	0.045	Mg1O1	0.083
CaK: 1	0.963	0.677	0.37	Ca1O1	0.947
NaK: 1	0.941	1.894	1.804	Na2O1	2.553
K K: 1	0.994	4.706	2.635	K 2O1	5.669
O K: 1	0	46.231	63.254
TOTAL		95.154	100		95.154
CIA					56.0998
-------	------	---------	--------	--------	-------
ELMT	ZAF	%ELMT	ATOM.%		%OXIDE
SiK: 1	0.964	33.258	26.004	Si1O2	71.146
TiK: 1	0.899	0.338	0.155	Ti1O2	0.564
AlK: 1	0.964	6.048	4.924	Al2O3	11.428
CrK: 1	0.89	0.073	0.031	Cr2O3	0.107
FeK: 1	0.818	1.815	0.714	Fe1O1	2.335
MnK: 1	0.807	0	0	Mn1O1	0
MgK: 1	0.915	0.079	0.071	Mg1O1	0.131
CaK: 1	0.963	0.603	0.33	Ca1O1	0.843
NaK: 1	0.938	1.884	1.8	Na2O1	2.54
K K: 1	0.995	4.991	2.803	K 2O1	6.012
O K: 1	0	46.017	63.168
TOTAL		95.105	100		95.106
CIA					54.8816
-------	------	---------	--------	--------	-------
ELMT	ZAF	%ELMT	ATOM.%		%OXIDE
SiK: 1	0.964	33.557	26.12	Si1O2	71.786
TiK: 1	0.899	0.272	0.124	Ti1O2	0.454
AlK: 1	0.964	6.142	4.977	Al2O3	11.605
CrK: 1	0.89	0	0	Cr2O3	0
FeK: 1	0.818	1.693	0.663	Fe1O1	2.177
MnK: 1	0.806	0	0	Mn1O1	0
MgK: 1	0.915	0.04	0.036	Mg1O1	0.066
CaK: 1	0.963	0.644	0.351	Ca1O1	0.901
NaK: 1	0.941	2.043	1.943	Na2O1	2.755
K K: 1	0.994	4.543	2.54	K 2O1	5.472
O K: 1	0	46.282	63.245
TOTAL		95.216	100		95.216
CIA					55.9736
-------	------	---------	--------	--------	-------

## Sheet: BJ-1-10b
Glass BJ-1-10
ELMT	ZAF	%ELMT	ATOM.%		%OXIDE
SiK: 1	0.966	33.895	26.699	Si1O2	72.509
TiK: 1	0.898	0.101	0.047	Ti1O2	0.168
AlK: 1	0.967	5.764	4.727	Al2O3	10.891
CrK: 1	0.888	0	0	Cr2O3	0
FeK: 1	0.817	1.465	0.58	Fe1O1	1.885
MnK: 1	0.806	0	0	Mn1O1	0
MgK: 1	0.918	0.002	0.002	Mg1O1	0.003
CaK: 1	0.962	0.454	0.25	Ca1O1	0.635
NaK: 1	0.944	1.883	1.812	Na2O1	2.538
K K: 1	0.991	4.199	2.376	K 2O1	5.058
O K: 1	0	45.924	63.507
TOTAL		93.687	100		93.687
CIA					56.9553
-------	------	---------	---------	------	--------
ELMT	ZAF	%ELMT	ATOM.%		%OXIDE
SiK: 1	0.966	33.895	26.648	Si1O2	72.509
TiK: 1	0.898	0.156	0.072	Ti1O2	0.261
AlK: 1	0.968	5.853	4.791	Al2O3	11.059
CrK: 1	0.888	0.074	0.031	Cr2O3	0.108
FeK: 1	0.817	1.346	0.532	Fe1O1	1.731
MnK: 1	0.806	0	0	Mn1O1	0
MgK: 1	0.919	0	0	Mg1O1	0
CaK: 1	0.962	0.448	0.247	Ca1O1	0.628
NaK: 1	0.944	1.796	1.725	Na2O1	2.421
K K: 1	0.992	4.294	2.425	K 2O1	5.172
O K: 1	0	46.026	63.528
TOTAL		93.888	100		93.888
CIA					57.36
-------	------	---------	---------	------	--------
ELMT	ZAF	%ELMT	ATOM.%		%OXIDE
SiK: 1	0.967	33.936	26.646	Si1O2	72.596
TiK: 1	0.898	0.214	0.099	Ti1O2	0.357
AlK: 1	0.968	5.822	4.759	Al2O3	11
CrK: 1	0.888	0.049	0.021	Cr2O3	0.071
FeK: 1	0.817	1.38	0.545	Fe1O1	1.776
MnK: 1	0.806	0.083	0.033	Mn1O1	0.107
MgK: 1	0.919	0	0	Mg1O1	0
CaK: 1	0.962	0.388	0.214	Ca1O1	0.543
NaK: 1	0.943	1.764	1.693	Na2O1	2.378
K K: 1	0.992	4.367	2.463	K 2O1	5.26
O K: 1	0	46.086	63.528
TOTAL		94.088	100		94.088
CIA					57.3484
-------	------	---------	---------	------	--------
ELMT	ZAF	%ELMT	ATOM.%		%OXIDE
SiK: 1	0.967	34.125	26.601	Si1O2	72.999
TiK: 1	0.898	0.156	0.071	Ti1O2	0.26
AlK: 1	0.968	5.912	4.798	Al2O3	11.171
CrK: 1	0.889	0	0	Cr2O3	0
FeK: 1	0.817	1.509	0.592	Fe1O1	1.942
MnK: 1	0.806	0	0	Mn1O1	0
MgK: 1	0.919	0	0	Mg1O1	0
CaK: 1	0.962	0.487	0.266	Ca1O1	0.681
NaK: 1	0.943	1.695	1.615	Na2O1	2.285
K K: 1	0.992	4.582	2.566	K 2O1	5.519
O K: 1	0	46.392	63.491
TOTAL		94.858	100		94.858
CIA					56.8325
-------	------	---------	---------	------	--------
ELMT	ZAF	%ELMT	ATOM.%		%OXIDE
SiK: 1	0.965	33.611	26.533	Si1O2	71.901
TiK: 1	0.899	0.123	0.057	Ti1O2	0.206
AlK: 1	0.966	5.866	4.821	Al2O3	11.084
CrK: 1	0.89	0.015	0.007	Cr2O3	0.023
FeK: 1	0.817	1.765	0.701	Fe1O1	2.27
MnK: 1	0.806	0	0	Mn1O1	0
MgK: 1	0.917	0	0	Mg1O1	0
CaK: 1	0.962	0.436	0.241	Ca1O1	0.61
NaK: 1	0.941	1.83	1.765	Na2O1	2.467
K K: 1	0.992	4.264	2.418	K 2O1	5.136
O K: 1	0	45.786	63.456
TOTAL		93.696	100		93.696
CIA					57.439
-------	------	---------	---------	------	--------
ELMT	ZAF	%ELMT	ATOM.%		%OXIDE
SiK: 1	0.966	33.77	26.587	Si1O2	72.241
TiK: 1	0.898	0.153	0.07	Ti1O2	0.254
AlK: 1	0.968	5.87	4.811	Al2O3	11.091
CrK: 1	0.889	0	0	Cr2O3	0
FeK: 1	0.817	1.527	0.605	Fe1O1	1.964
MnK: 1	0.806	0	0	Mn1O1	0
MgK: 1	0.919	0	0	Mg1O1	0
CaK: 1	0.962	0.502	0.277	Ca1O1	0.703
NaK: 1	0.942	1.696	1.632	Na2O1	2.287
K K: 1	0.992	4.464	2.525	K 2O1	5.378
O K: 1	0	45.936	63.492
TOTAL		93.918	100		93.918
CIA					56.9968
-------	------	---------	---------	------	--------
ELMT	ZAF	%ELMT	ATOM.%		%OXIDE
SiK: 1	0.967	33.805	26.521	Si1O2	72.315
TiK: 1	0.898	0.142	0.065	Ti1O2	0.236
AlK: 1	0.969	5.881	4.804	Al2O3	11.112
CrK: 1	0.889	0.008	0.004	Cr2O3	0.012
FeK: 1	0.817	1.463	0.577	Fe1O1	1.882
MnK: 1	0.806	0	0	Mn1O1	0
MgK: 1	0.92	0.002	0.002	Mg1O1	0.003
CaK: 1	0.961	0.512	0.282	Ca1O1	0.717
NaK: 1	0.942	1.58	1.514	Na2O1	2.13
K K: 1	0.993	5.004	2.82	K 2O1	6.027
O K: 1	0	46.039	63.411
TOTAL		94.435	100		94.435
CIA					55.5989
-------	------	---------	---------	------	--------
ELMT	ZAF	%ELMT	ATOM.%		%OXIDE
SiK: 1	0.968	33.797	26.604	Si1O2	72.298
TiK: 1	0.898	0.111	0.051	Ti1O2	0.185
AlK: 1	0.969	5.78	4.737	Al2O3	10.922
CrK: 1	0.889	0.114	0.048	Cr2O3	0.166
FeK: 1	0.817	1.456	0.576	Fe1O1	1.873
MnK: 1	0.806	0.039	0.016	Mn1O1	0.05
MgK: 1	0.92	0	0	Mg1O1	0
CaK: 1	0.961	0.458	0.253	Ca1O1	0.641
NaK: 1	0.941	1.465	1.409	Na2O1	1.974
K K: 1	0.993	5.034	2.847	K 2O1	6.064
O K: 1	0	45.92	63.46
TOTAL		94.173	100		94.173
CIA					55.7216
-------	------	---------	---------	------	--------
ELMT	ZAF	%ELMT	ATOM.%		%OXIDE
SiK: 1	0.968	33.489	26.514	Si1O2	71.638
TiK: 1	0.897	0.115	0.053	Ti1O2	0.192
AlK: 1	0.97	5.856	4.827	Al2O3	11.064
CrK: 1	0.888	0.018	0.008	Cr2O3	0.026
FeK: 1	0.817	1.289	0.513	Fe1O1	1.658
MnK: 1	0.806	0.026	0.01	Mn1O1	0.033
MgK: 1	0.922	0.013	0.012	Mg1O1	0.022
CaK: 1	0.96	0.484	0.269	Ca1O1	0.678
NaK: 1	0.943	1.392	1.346	Na2O1	1.876
K K: 1	0.993	5.373	3.056	K 2O1	6.472
O K: 1	0	45.606	63.392
TOTAL		93.659	100		93.659
CIA					55.0722
-------	------	---------	---------	------	--------
ELMT	ZAF	%ELMT	ATOM.%		%OXIDE
SiK: 1	0.967	33.62	26.496	Si1O2	71.92
TiK: 1	0.898	0.203	0.094	Ti1O2	0.339
AlK: 1	0.969	5.908	4.848	Al2O3	11.164
CrK: 1	0.889	0.003	0.001	Cr2O3	0.005
FeK: 1	0.817	1.478	0.586	Fe1O1	1.901
MnK: 1	0.806	0.006	0.002	Mn1O1	0.007
MgK: 1	0.92	0	0	Mg1O1	0
CaK: 1	0.961	0.463	0.256	Ca1O1	0.648
NaK: 1	0.942	1.543	1.486	Na2O1	2.08
K K: 1	0.993	4.935	2.794	K 2O1	5.945
O K: 1	0	45.849	63.437
TOTAL		94.008	100		94.008
CIA					56.2787
-------	------	---------	---------	------	--------
ELMT	ZAF	%ELMT	ATOM.%		%OXIDE
SiK: 1	0.967	33.73	26.431	Si1O2	72.156
TiK: 1	0.898	0.16	0.073	Ti1O2	0.266
AlK: 1	0.968	5.95	4.854	Al2O3	11.243
CrK: 1	0.889	0.045	0.019	Cr2O3	0.066
FeK: 1	0.818	1.574	0.62	Fe1O1	2.025
MnK: 1	0.806	0.044	0.018	Mn1O1	0.057
MgK: 1	0.92	0	0	Mg1O1	0
CaK: 1	0.961	0.418	0.23	Ca1O1	0.585
NaK: 1	0.94	1.52	1.455	Na2O1	2.048
K K: 1	0.993	5.194	2.924	K 2O1	6.257
O K: 1	0	46.068	63.376
TOTAL		94.704	100		94.704
CIA					55.8436
-------	------	---------	---------	------	--------

## Sheet: SRD-1-2
Glass SRD-1-2
ELMT	ZAF	%ELMT	ATOM.%		%OXIDE
SiK: 1	0.966	33.712	26.584	Si1O2	72.117
TiK: 1	0.898	0.12	0.055	Ti1O2	0.2
AlK: 1	0.967	5.792	4.755	Al2O3	10.945
CrK: 1	0.888	0.013	0.006	Cr2O3	0.02
FeK: 1	0.817	1.39	0.551	Fe1O1	1.789
MnK: 1	0.806	0.003	0.001	Mn1O1	0.004
MgK: 1	0.918	0	0	Mg1O1	0
CaK: 1	0.962	0.457	0.253	Ca1O1	0.639
NaK: 1	0.945	1.991	1.918	Na2O1	2.684
K K: 1	0.992	4.343	2.46	K 2O1	5.231
O K: 1	0	45.807	63.416
TOTAL		93.628	100		93.628
CIA					56.1311
-------	------	---------	--------	--------	-------
ELMT	ZAF	%ELMT	ATOM.%		%OXIDE
SiK: 1	0.965	33.717	26.548	Si1O2	72.126
TiK: 1	0.898	0.131	0.06	Ti1O2	0.218
AlK: 1	0.966	5.831	4.78	Al2O3	11.019
CrK: 1	0.888	0.049	0.021	Cr2O3	0.071
FeK: 1	0.817	1.385	0.549	Fe1O1	1.782
MnK: 1	0.806	0	0	Mn1O1	0
MgK: 1	0.917	0.012	0.011	Mg1O1	0.02
CaK: 1	0.962	0.414	0.228	Ca1O1	0.579
NaK: 1	0.945	2.087	2.008	Na2O1	2.813
K K: 1	0.992	4.227	2.391	K 2O1	5.092
O K: 1	0	45.868	63.405
TOTAL		93.72	100		93.72
CIA					56.499
-------	------	---------	--------	--------	-------
ELMT	ZAF	%ELMT	ATOM.%		%OXIDE
SiK: 1	0.965	33.86	26.42	Si1O2	72.434
TiK: 1	0.899	0.092	0.042	Ti1O2	0.154
AlK: 1	0.965	5.972	4.851	Al2O3	11.284
CrK: 1	0.89	0.049	0.021	Cr2O3	0.072
FeK: 1	0.817	1.722	0.676	Fe1O1	2.215
MnK: 1	0.806	0	0	Mn1O1	0
MgK: 1	0.916	0	0	Mg1O1	0
CaK: 1	0.962	0.423	0.232	Ca1O1	0.592
NaK: 1	0.941	1.98	1.887	Na2O1	2.668
K K: 1	0.992	4.504	2.525	K 2O1	5.425
O K: 1	0	46.243	63.346
TOTAL		94.845	100		94.845
CIA					56.5076
-------	------	---------	--------	--------	-------
ELMT	ZAF	%ELMT	ATOM.%		%OXIDE
SiK: 1	0.964	33.265	26.317	Si1O2	71.16
TiK: 1	0.898	0.17	0.079	Ti1O2	0.283
AlK: 1	0.965	5.93	4.885	Al2O3	11.206
CrK: 1	0.889	0	0	Cr2O3	0
FeK: 1	0.817	1.486	0.591	Fe1O1	1.912
MnK: 1	0.806	0.051	0.021	Mn1O1	0.066
MgK: 1	0.917	0.045	0.041	Mg1O1	0.074
CaK: 1	0.962	0.486	0.27	Ca1O1	0.68
NaK: 1	0.943	2.029	1.961	Na2O1	2.735
K K: 1	0.993	4.476	2.544	K 2O1	5.392
O K: 1	0	45.57	63.293
TOTAL		93.508	100		93.508
CIA					55.9936
-------	------	---------	--------	--------	-------
ELMT	ZAF	%ELMT	ATOM.%		%OXIDE
SiK: 1	0.965	33.648	26.416	Si1O2	71.979
TiK: 1	0.898	0.098	0.045	Ti1O2	0.163
AlK: 1	0.966	5.963	4.874	Al2O3	11.268
CrK: 1	0.889	0	0	Cr2O3	0
FeK: 1	0.817	1.47	0.581	Fe1O1	1.892
MnK: 1	0.806	0.114	0.046	Mn1O1	0.148
MgK: 1	0.917	0	0	Mg1O1	0
CaK: 1	0.962	0.49	0.269	Ca1O1	0.685
NaK: 1	0.943	2.033	1.95	Na2O1	2.74
K K: 1	0.992	4.389	2.475	K 2O1	5.287
O K: 1	0	45.956	63.343
TOTAL		94.161	100		94.161
CIA					56.3964
-------	------	---------	--------	--------	-------
ELMT	ZAF	%ELMT	ATOM.%		%OXIDE
SiK: 1	0.965	33.457	26.475	Si1O2	71.571
TiK: 1	0.898	0.06	0.028	Ti1O2	0.1
AlK: 1	0.966	5.839	4.81	Al2O3	11.032
CrK: 1	0.889	0.055	0.024	Cr2O3	0.081
FeK: 1	0.817	1.419	0.565	Fe1O1	1.825
MnK: 1	0.806	0.046	0.018	Mn1O1	0.059
MgK: 1	0.917	0	0	Mg1O1	0
CaK: 1	0.962	0.478	0.265	Ca1O1	0.669
NaK: 1	0.944	2.057	1.988	Na2O1	2.772
K K: 1	0.992	4.372	2.485	K 2O1	5.266
O K: 1	0	45.594	63.341
TOTAL		93.377	100		93.377
CIA					55.8894
-------	------	---------	--------	--------	-------
ELMT	ZAF	%ELMT	ATOM.%		%OXIDE
SiK: 1	0.966	33.885	26.41	Si1O2	72.487
TiK: 1	0.898	0.167	0.076	Ti1O2	0.278
AlK: 1	0.968	6.109	4.957	Al2O3	11.543
CrK: 1	0.889	0	0	Cr2O3	0
FeK: 1	0.818	1.51	0.592	Fe1O1	1.942
MnK: 1	0.806	0.11	0.044	Mn1O1	0.142
MgK: 1	0.92	0.006	0.005	Mg1O1	0.01
CaK: 1	0.962	0.454	0.248	Ca1O1	0.636
NaK: 1	0.941	1.524	1.452	Na2O1	2.055
K K: 1	0.993	4.99	2.794	K 2O1	6.011
O K: 1	0	46.349	63.421
TOTAL		95.104	100		95.104
CIA					57.0165
-------	------	---------	--------	--------	-------
ELMT	ZAF	%ELMT	ATOM.%		%OXIDE
SiK: 1	0.967	33.899	26.493	Si1O2	72.516
TiK: 1	0.898	0.138	0.063	Ti1O2	0.23
AlK: 1	0.967	5.855	4.764	Al2O3	11.063
CrK: 1	0.888	0.012	0.005	Cr2O3	0.018
FeK: 1	0.817	1.371	0.539	Fe1O1	1.764
MnK: 1	0.806	0.072	0.029	Mn1O1	0.093
MgK: 1	0.918	0	0	Mg1O1	0
CaK: 1	0.961	0.47	0.257	Ca1O1	0.658
NaK: 1	0.944	1.871	1.787	Na2O1	2.522
K K: 1	0.993	4.84	2.717	K 2O1	5.83
O K: 1	0	46.166	63.345
TOTAL		94.695	100		94.695
CIA					55.1138
-------	------	---------	--------	--------	-------
ELMT	ZAF	%ELMT	ATOM.%		%OXIDE
SiK: 1	0.965	33.749	26.34	Si1O2	72.196
TiK: 1	0.899	0.208	0.095	Ti1O2	0.347
AlK: 1	0.965	5.906	4.799	Al2O3	11.159
CrK: 1	0.89	0.019	0.008	Cr2O3	0.028
FeK: 1	0.818	1.692	0.664	Fe1O1	2.177
MnK: 1	0.806	0.022	0.009	Mn1O1	0.028
MgK: 1	0.915	0	0	Mg1O1	0
CaK: 1	0.963	0.547	0.299	Ca1O1	0.765
NaK: 1	0.941	2.058	1.963	Na2O1	2.775
K K: 1	0.993	4.506	2.527	K 2O1	5.428
O K: 1	0	46.196	63.297
TOTAL		94.903	100		94.903
CIA					55.4429
-------	------	---------	--------	--------	-------
ELMT	ZAF	%ELMT	ATOM.%		%OXIDE
SiK: 1	0.967	33.989	26.502	Si1O2	72.709
TiK: 1	0.898	0.161	0.074	Ti1O2	0.269
AlK: 1	0.968	5.918	4.804	Al2O3	11.182
CrK: 1	0.888	0	0	Cr2O3	0
FeK: 1	0.817	1.398	0.548	Fe1O1	1.798
MnK: 1	0.806	0.042	0.017	Mn1O1	0.054
MgK: 1	0.92	0.007	0.006	Mg1O1	0.011
CaK: 1	0.961	0.498	0.272	Ca1O1	0.697
NaK: 1	0.943	1.649	1.571	Na2O1	2.223
K K: 1	0.993	5.02	2.812	K 2O1	6.047
O K: 1	0	46.309	63.393
TOTAL		94.99	100		94.99
CIA					55.4966
-------	------	---------	--------	--------	-------
ELMT	ZAF	%ELMT	ATOM.%		%OXIDE
SiK: 1	0.968	33.758	26.623	Si1O2	72.215
TiK: 1	0.898	0.173	0.08	Ti1O2	0.289
AlK: 1	0.97	5.838	4.793	Al2O3	11.031
CrK: 1	0.888	0	0	Cr2O3	0
FeK: 1	0.817	1.419	0.563	Fe1O1	1.826
MnK: 1	0.806	0.021	0.008	Mn1O1	0.027
MgK: 1	0.922	0	0	Mg1O1	0
CaK: 1	0.961	0.439	0.243	Ca1O1	0.615
NaK: 1	0.942	1.379	1.329	Na2O1	1.859
K K: 1	0.993	5.041	2.856	K 2O1	6.073
O K: 1	0	45.866	63.504
TOTAL		93.936	100		93.936
CIA					56.3439
-------	------	---------	--------	--------	-------
ELMT	ZAF	%ELMT	ATOM.%		%OXIDE
SiK: 1	0.966	33.464	26.611	Si1O2	71.586
TiK: 1	0.898	0.095	0.044	Ti1O2	0.158
AlK: 1	0.967	5.835	4.831	Al2O3	11.025
CrK: 1	0.888	0	0	Cr2O3	0
FeK: 1	0.817	1.385	0.554	Fe1O1	1.782
MnK: 1	0.806	0	0	Mn1O1	0
MgK: 1	0.919	0	0	Mg1O1	0
CaK: 1	0.962	0.444	0.248	Ca1O1	0.621
NaK: 1	0.945	1.864	1.811	Na2O1	2.513
K K: 1	0.992	4.247	2.426	K 2O1	5.116
O K: 1	0	45.467	63.476
TOTAL		92.8	100		92.8
CIA					57.1984
-------	------	---------	--------	--------	-------
ELMT	ZAF	%ELMT	ATOM.%		%OXIDE
SiK: 1	0.967	33.746	26.569	Si1O2	72.19
TiK: 1	0.898	0.104	0.048	Ti1O2	0.174
AlK: 1	0.969	5.884	4.823	Al2O3	11.117
CrK: 1	0.888	0.038	0.016	Cr2O3	0.055
FeK: 1	0.817	1.416	0.561	Fe1O1	1.822
MnK: 1	0.806	0.053	0.021	Mn1O1	0.068
MgK: 1	0.921	0.029	0.026	Mg1O1	0.048
CaK: 1	0.961	0.425	0.235	Ca1O1	0.595
NaK: 1	0.942	1.437	1.383	Na2O1	1.938
K K: 1	0.993	5.058	2.861	K 2O1	6.093
O K: 1	0	45.909	63.457
TOTAL		94.1	100		94.1
CIA					56.3086
-------	------	---------	--------	--------	-------
ELMT	ZAF	%ELMT	ATOM.%		%OXIDE
SiK: 1	0.966	33.349	26.485	Si1O2	71.34
TiK: 1	0.898	0.146	0.068	Ti1O2	0.243
AlK: 1	0.967	5.849	4.836	Al2O3	11.051
CrK: 1	0.889	0.008	0.003	Cr2O3	0.011
FeK: 1	0.817	1.568	0.626	Fe1O1	2.018
MnK: 1	0.806	0	0	Mn1O1	0
MgK: 1	0.918	0.052	0.048	Mg1O1	0.086
CaK: 1	0.962	0.431	0.24	Ca1O1	0.603
NaK: 1	0.942	1.772	1.719	Na2O1	2.388
K K: 1	0.992	4.481	2.557	K 2O1	5.398
O K: 1	0	45.483	63.417
TOTAL		93.139	100		93.139
CIA					56.8467
-------	------	---------	--------	--------	-------
ELMT	ZAF	%ELMT	ATOM.%		%OXIDE
SiK: 1	0.965	33.881	26.497	Si1O2	72.479
TiK: 1	0.898	0.117	0.054	Ti1O2	0.196
AlK: 1	0.967	5.971	4.862	Al2O3	11.282
CrK: 1	0.889	0	0	Cr2O3	0
FeK: 1	0.817	1.491	0.586	Fe1O1	1.918
MnK: 1	0.806	0.104	0.041	Mn1O1	0.134
MgK: 1	0.918	0	0	Mg1O1	0
CaK: 1	0.962	0.486	0.266	Ca1O1	0.68
NaK: 1	0.943	1.919	1.834	Na2O1	2.587
K K: 1	0.992	4.338	2.437	K 2O1	5.225
O K: 1	0	46.194	63.423
TOTAL		94.501	100		94.501
CIA					57.0547
-------	------	---------	--------	--------	-------

## Sheet: MA-1-5M
Weight %													Atomic %													Oxide Wt %
Si	Mg	Na	Al	Fe	Mn	K	Ti	Ca	Cr	O	Total		Si	Mg	Na	Al	Fe	Mn	K	Ti	Ca	Cr	O	Total		SiO2	MgO	Na2O	Al2O3	FeO	MnO	K2O	TiO2	CaO	Cr2O3	Total	CIA
33.07	-0.02	1.43	5.85	1.95	0.06	2.95	0.1	0.32	0.03	44.76	90.51		26.91	-0.01	1.42	4.96	0.8	0.03	1.72	0.05	0.18	0.01	63.94	100		70.76	-0.03	1.92	11.06	2.51	0.08	3.55	0.16	0.45	0.04	90.53	65.1355
33.1	-0.01	1.49	5.88	1.95	0.06	3.08	0.09	0.24	0.01	44.82	90.7		26.88	-0.01	1.47	4.97	0.79	0.03	1.8	0.04	0.13	0	63.89	100		70.81	-0.01	2	11.1	2.5	0.08	3.71	0.15	0.33	0.02	90.71	64.7608
32.96	0.01	1.74	5.93	1.92	0.04	3.04	0.11	0.27	-0.02	44.79	90.79		26.73	0.01	1.72	5.01	0.78	0.02	1.77	0.05	0.15	-0.01	63.76	100		70.51	0.02	2.34	11.2	2.47	0.06	3.67	0.18	0.37	-0.03	90.82	63.7088
32.49	0.06	0.75	5.84	1.59	0.07	4.81	0.2	0.64	-0.03	44.35	90.77		26.57	0.06	0.75	4.98	0.65	0.03	2.82	0.1	0.36	-0.02	63.68	100		69.5	0.11	1.02	11.04	2.05	0.09	5.79	0.34	0.89	-0.05	90.82	58.9114
32.55	0.09	0.92	5.8	1.51	0.02	4.81	0.2	0.54	-0.07	44.37	90.74		26.6	0.09	0.92	4.94	0.62	0.01	2.82	0.1	0.31	-0.03	63.64	100		69.65	0.15	1.24	10.97	1.94	0.03	5.79	0.33	0.75	-0.11	90.85	58.5067
33.2	-0.01	1.63	5.82	1.9	0.05	3.11	0.08	0.29	0.09	44.96	91.11		26.85	-0.01	1.61	4.9	0.77	0.02	1.8	0.04	0.16	0.04	63.82	100		71.03	-0.02	2.19	10.99	2.45	0.07	3.74	0.13	0.4	0.13	91.13	63.4527
32.96	0.05	0.78	5.85	1.45	0.03	4.63	0.19	0.54	0.01	44.79	91.29		26.74	0.05	0.78	4.94	0.59	0.01	2.7	0.09	0.31	0	63.78	100		70.51	0.08	1.06	11.06	1.86	0.04	5.58	0.32	0.76	0.01	91.29	59.9133
32.92	0.1	0.72	5.94	1.53	0	4.6	0.18	0.55	-0.02	44.83	91.36		26.69	0.1	0.71	5.01	0.62	0	2.68	0.09	0.31	-0.01	63.79	100		70.44	0.17	0.97	11.22	1.97	0	5.54	0.3	0.77	-0.03	91.39	60.6486
32.85	0.09	0.76	5.9	1.41	0.01	4.82	0.22	0.63	0.02	44.81	91.54		26.61	0.08	0.76	4.98	0.58	0	2.8	0.11	0.36	0.01	63.72	100		70.29	0.15	1.03	11.15	1.82	0.01	5.8	0.37	0.88	0.04	91.54	59.1198
32.96	0.08	0.65	5.9	1.51	0.02	4.82	0.21	0.56	0	44.87	91.57		26.69	0.07	0.64	4.97	0.62	0.01	2.8	0.1	0.32	0	63.78	100		70.52	0.13	0.88	11.14	1.95	0.02	5.81	0.34	0.78	0	91.58	59.8603
32.48	0.06	1.17	5.96	1.66	0.03	4.94	0.23	0.66	0	44.66	91.84		26.28	0.05	1.15	5.02	0.68	0.01	2.87	0.11	0.37	0	63.45	100		69.48	0.09	1.57	11.26	2.14	0.04	5.95	0.38	0.92	0.01	91.84	57.1574
32.9	0.1	0.67	5.95	1.51	0.05	4.97	0.21	0.63	0.01	44.93	91.92		26.57	0.09	0.66	5	0.61	0.02	2.88	0.1	0.35	0	63.7	100		70.38	0.16	0.9	11.24	1.95	0.06	5.98	0.35	0.88	0.02	91.92	59.1579
32.9	0.09	0.76	6.01	1.71	0.08	4.57	0.22	0.64	0.01	45.02	92.01		26.54	0.09	0.75	5.05	0.69	0.03	2.65	0.1	0.36	0	63.74	100		70.39	0.15	1.03	11.36	2.2	0.1	5.5	0.36	0.89	0.01	92.01	60.4899
32.87	0.07	0.8	5.97	1.71	0.05	4.82	0.2	0.63	-0.07	44.92	91.97		26.54	0.07	0.79	5.01	0.7	0.02	2.8	0.09	0.36	-0.03	63.66	100		70.31	0.12	1.07	11.27	2.2	0.06	5.81	0.33	0.88	-0.1	92.06	59.2223
33.06	0.1	0.87	5.94	1.45	0.06	4.69	0.21	0.58	0.03	45.1	92.09		26.61	0.09	0.85	4.98	0.59	0.03	2.71	0.1	0.33	0.01	63.71	100		70.73	0.17	1.17	11.22	1.87	0.08	5.64	0.35	0.81	0.04	92.09	59.5541
33.29	0.09	0.79	5.86	1.56	0.01	4.48	0.21	0.61	-0.02	45.21	92.07		26.77	0.08	0.77	4.9	0.63	0.01	2.59	0.1	0.34	-0.01	63.82	100		71.22	0.15	1.06	11.06	2.01	0.02	5.39	0.35	0.85	-0.03	92.11	60.2397
33.01	0.08	0.71	5.9	1.6	0.02	4.74	0.24	0.7	0.03	45.06	92.11		26.6	0.08	0.7	4.95	0.65	0.01	2.74	0.11	0.4	0.02	63.74	100		70.62	0.14	0.96	11.16	2.06	0.03	5.7	0.4	0.99	0.05	92.11	59.3301
32.99	0.08	0.78	6.01	1.64	0.06	4.48	0.24	0.71	0.05	45.12	92.15		26.55	0.07	0.76	5.04	0.66	0.02	2.59	0.11	0.4	0.02	63.76	100		70.57	0.13	1.05	11.36	2.11	0.07	5.39	0.4	1	0.08	92.15	60.4255
33.57	0.01	1.76	5.92	1.95	0.08	3.04	0.1	0.28	-0.01	45.51	92.21		26.8	0.01	1.72	4.92	0.78	0.03	1.75	0.05	0.15	0	63.79	100		71.81	0.02	2.37	11.19	2.51	0.11	3.67	0.17	0.39	-0.02	92.23	63.5074
33.18	0.07	1.01	5.92	1.57	0.03	4.46	0.21	0.59	0.01	45.22	92.27		26.63	0.07	0.99	4.95	0.63	0.01	2.57	0.1	0.33	0.01	63.71	100		70.98	0.12	1.36	11.19	2.02	0.04	5.37	0.35	0.82	0.02	92.27	59.7118
33.38	-0.01	2.12	6.04	2.07	0.08	3.07	0.09	0.25	0.01	45.54	92.64		26.55	-0.01	2.06	5	0.83	0.03	1.75	0.04	0.14	0	63.59	100		71.41	-0.01	2.86	11.41	2.66	0.1	3.69	0.15	0.35	0.02	92.65	62.3157
33.1	0.09	0.77	5.98	1.72	0.13	4.76	0.22	0.67	0.01	45.28	92.71		26.52	0.08	0.76	4.99	0.69	0.05	2.74	0.1	0.38	0.01	63.69	100		70.81	0.14	1.04	11.3	2.21	0.16	5.73	0.37	0.94	0.02	92.71	59.4424
33.71	0	1.74	5.95	1.97	0.08	3.18	0.09	0.27	-0.01	45.71	92.69		26.79	0	1.69	4.92	0.79	0.03	1.81	0.04	0.15	0	63.77	100		72.12	0	2.34	11.24	2.54	0.11	3.83	0.15	0.38	-0.02	92.71	63.1816
32.75	0.06	1.61	6.03	1.54	0.04	4.71	0.24	0.62	0.02	45.11	92.73		26.2	0.05	1.58	5.02	0.62	0.02	2.71	0.11	0.35	0.01	63.34	100		70.06	0.09	2.18	11.39	1.98	0.06	5.68	0.41	0.87	0.03	92.73	56.6103
33.77	0	1.72	5.95	1.95	0.01	3.15	0.11	0.31	0.01	45.77	92.73		26.82	0	1.66	4.92	0.78	0	1.79	0.05	0.17	0	63.8	100		72.24	-0.01	2.31	11.24	2.5	0.01	3.79	0.19	0.43	0.01	92.73	63.2527
33.45	0.08	0.74	5.93	1.53	0	4.77	0.19	0.59	0.03	45.49	92.8		26.71	0.08	0.72	4.93	0.61	0	2.74	0.09	0.33	0.01	63.77	100		71.55	0.13	0.99	11.21	1.97	-0.01	5.75	0.32	0.83	0.05	92.81	59.6912
33.77	0.03	0.81	5.74	1.31	0.01	4.98	0.17	0.5	-0.02	45.59	92.9		26.91	0.03	0.79	4.77	0.53	0.01	2.85	0.08	0.28	-0.01	63.77	100		72.25	0.05	1.09	10.85	1.69	0.02	6	0.28	0.69	-0.03	92.93	58.2394
33.1	0.09	1.44	5.93	1.51	0.04	4.71	0.2	0.6	0.02	45.34	92.97		26.39	0.08	1.4	4.92	0.61	0.01	2.7	0.09	0.34	0.01	63.45	100		70.81	0.15	1.94	11.21	1.95	0.05	5.68	0.33	0.84	0.03	92.97	56.9903
33.67	0.07	0.82	5.83	1.31	0.01	5.05	0.18	0.5	-0.01	45.6	93.03		26.81	0.06	0.8	4.83	0.53	0	2.89	0.08	0.28	0	63.73	100		72.04	0.11	1.1	11.01	1.69	0.01	6.09	0.29	0.69	-0.01	93.03	58.2848
33.02	0.1	1.34	6.1	1.48	0.03	4.79	0.22	0.61	0.01	45.39	93.09		26.3	0.09	1.3	5.06	0.59	0.01	2.74	0.1	0.34	0	63.46	100		70.64	0.16	1.8	11.53	1.9	0.04	5.76	0.37	0.85	0.02	93.09	57.8235
33.28	0.08	1.52	5.91	1.44	0	4.68	0.18	0.59	0	45.49	93.18		26.45	0.07	1.47	4.89	0.58	0	2.67	0.08	0.33	0	63.45	100		71.2	0.13	2.04	11.17	1.85	0	5.64	0.3	0.82	0.01	93.18	56.787
33.63	0.08	0.68	5.99	1.43	0.05	4.87	0.2	0.59	0	45.72	93.24		26.73	0.07	0.67	4.95	0.57	0.02	2.78	0.09	0.33	0	63.79	100		71.95	0.13	0.92	11.31	1.84	0.06	5.87	0.34	0.83	0	93.24	59.7464
33.05	-0.02	3.24	6.07	1.98	0.03	3.02	0.07	0.27	0.01	45.52	93.24		26.1	-0.02	3.13	4.99	0.78	0.01	1.71	0.03	0.15	0	63.1	100		70.7	-0.03	4.37	11.47	2.54	0.04	3.64	0.11	0.38	0.02	93.27	57.7543
33.17	0.05	1.28	6.01	1.47	0.04	4.97	0.22	0.62	0.02	45.47	93.32		26.37	0.04	1.24	4.97	0.59	0.02	2.84	0.1	0.35	0.01	63.46	100		70.96	0.08	1.72	11.35	1.9	0.05	5.99	0.37	0.87	0.04	93.32	56.9493
33.09	0.07	1.27	6.05	1.6	0.04	4.94	0.21	0.72	-0.04	45.46	93.41		26.3	0.06	1.24	5	0.64	0.02	2.82	0.1	0.4	-0.02	63.43	100		70.78	0.12	1.72	11.43	2.06	0.06	5.95	0.34	1	-0.05	93.46	56.8657
33.53	0.07	1.41	5.94	1.39	0.05	4.79	0.2	0.52	-0.05	45.73	93.59		26.52	0.06	1.37	4.89	0.55	0.02	2.72	0.09	0.29	-0.02	63.5	100		71.73	0.11	1.91	11.22	1.79	0.07	5.77	0.34	0.72	-0.07	93.65	57.1865
33.71	0.06	1.03	5.9	1.22	0.1	5.29	0.15	0.41	-0.01	45.77	93.63		26.68	0.05	1	4.86	0.49	0.04	3.01	0.07	0.23	-0.01	63.59	100		72.11	0.1	1.39	11.15	1.57	0.13	6.38	0.25	0.57	-0.02	93.65	57.2088
33.66	0.09	0.89	6.01	1.48	0.04	4.92	0.23	0.56	-0.01	45.88	93.76		26.61	0.08	0.86	4.95	0.59	0.02	2.8	0.11	0.31	-0.01	63.68	100		72	0.14	1.21	11.36	1.91	0.06	5.93	0.39	0.78	-0.02	93.78	58.9212
33.4	0.07	1.25	5.89	1.54	0.05	5.15	0.21	0.57	0.01	45.66	93.79		26.44	0.06	1.21	4.86	0.61	0.02	2.93	0.1	0.31	0.01	63.45	100		71.45	0.12	1.69	11.13	1.99	0.06	6.2	0.34	0.79	0.02	93.79	56.1837
33.18	0.07	1.42	6.12	1.57	0.02	4.84	0.23	0.67	0	45.66	93.8		26.25	0.07	1.38	5.04	0.62	0.01	2.75	0.11	0.37	0	63.41	100		70.99	0.12	1.92	11.57	2.02	0.03	5.83	0.39	0.93	0	93.8	57.1358
33.8	0.09	1.09	6.03	1.57	-0.01	4.44	0.2	0.61	0.03	46.06	93.91		26.64	0.08	1.05	4.94	0.62	0	2.51	0.09	0.34	0.01	63.71	100		72.31	0.15	1.47	11.39	2.02	-0.01	5.34	0.34	0.85	0.04	93.92	59.79
33.74	0.05	1.23	5.88	1.27	0.03	5.23	0.18	0.48	-0.04	45.86	93.9		26.62	0.05	1.18	4.83	0.5	0.01	2.97	0.08	0.26	-0.02	63.51	100		72.18	0.09	1.66	11.1	1.63	0.04	6.3	0.29	0.67	-0.06	93.96	56.2595
33.57	0.06	1.64	6.02	1.5	0.04	4.56	0.2	0.57	-0.01	45.94	94.09		26.41	0.06	1.58	4.93	0.59	0.02	2.58	0.09	0.32	0	63.44	100		71.81	0.1	2.21	11.37	1.93	0.05	5.5	0.33	0.8	-0.02	94.11	57.1932
33.89	0.08	1.6	6.06	1.48	0.04	4.59	0.19	0.59	-0.02	46.33	94.8		26.45	0.07	1.52	4.92	0.58	0.01	2.57	0.09	0.32	-0.01	63.47	100		72.5	0.13	2.15	11.45	1.9	0.05	5.52	0.32	0.82	-0.03	94.83	57.4223
34.04	0.08	1.09	5.98	1.51	-0.03	5.19	0.2	0.55	0.02	46.37	94.99		26.58	0.07	1.04	4.86	0.59	-0.01	2.91	0.09	0.3	0.01	63.57	100		72.82	0.12	1.46	11.3	1.95	-0.04	6.25	0.33	0.77	0.03	95.03	57.1284
33.75	0.09	1.33	6.1	1.6	0.06	5.01	0.22	0.6	0.03	46.31	95.1		26.34	0.08	1.27	4.96	0.63	0.03	2.81	0.1	0.33	0.01	63.45	100		72.2	0.15	1.79	11.53	2.06	0.08	6.04	0.38	0.83	0.04	95.1	57.1075
34.22	0.06	1.27	5.91	1.22	0.01	5.31	0.18	0.46	-0.01	46.47	95.1		26.65	0.05	1.21	4.79	0.48	0	2.97	0.08	0.25	0	63.52	100		73.21	0.09	1.71	11.18	1.57	0.01	6.4	0.31	0.64	-0.01	95.12	56.0963
33.85	0	3.09	6.19	1.96	0.03	3.14	0.12	0.29	0.02	46.57	95.27		26.17	0	2.91	4.98	0.76	0.01	1.74	0.05	0.16	0.01	63.19	100		72.43	0.01	4.16	11.7	2.52	0.04	3.78	0.2	0.41	0.02	95.27	58.3541
34.08	0.02	3.19	6.06	1.8	-0.01	3.15	0.08	0.24	0.02	46.66	95.28		26.3	0.02	3	4.87	0.7	-0.01	1.74	0.04	0.13	0.01	63.2	100		72.91	0.04	4.3	11.46	2.31	-0.02	3.79	0.14	0.34	0.02	95.3	57.6169
33.99	0	3.27	6.12	1.93	0.06	3.23	0.07	0.23	0.04	46.71	95.66		26.17	0	3.08	4.9	0.75	0.02	1.79	0.03	0.13	0.02	63.11	100		72.73	0	4.41	11.56	2.48	0.07	3.89	0.12	0.33	0.06	95.66	57.2561
34.37	-0.01	3.12	6.1	1.99	0.02	3.11	0.11	0.25	-0.01	47.04	96.09		26.32	-0.01	2.92	4.87	0.77	0.01	1.71	0.05	0.14	-0.01	63.24	100		73.52	-0.02	4.2	11.53	2.56	0.03	3.75	0.18	0.36	-0.02	96.13	58.1149
34.22	-0.01	3.28	6.18	1.99	-0.02	3.31	0.08	0.24	-0.03	47	96.24		26.18	-0.01	3.07	4.92	0.77	-0.01	1.82	0.04	0.13	-0.01	63.11	100		73.21	-0.02	4.43	11.67	2.56	-0.03	3.99	0.14	0.34	-0.05	96.34	57.1219

## Sheet: PRD-1-2A
Glass PRD-1-2A
ELMT	ZAF	%ELMT	ATOM.%		%OXIDE
SiK: 1	0.967	34.567	26.574	Si1O2	73.946
TiK: 1	0.897	0.241	0.108	Ti1O2	0.401
AlK: 1	0.969	6.041	4.835	Al2O3	11.415
CrK: 1	0.887	0	0	Cr2O3	0
FeK: 1	0.817	1.195	0.462	Fe1O1	1.538
MnK: 1	0.805	0	0	Mn1O1	0
MgK: 1	0.921	0	0	Mg1O1	0
CaK: 1	0.961	0.435	0.235	Ca1O1	0.609
NaK: 1	0.946	1.706	1.603	Na2O1	2.3
K K: 1	0.992	4.909	2.711	K 2O1	5.913
O K: 1	0	47.028	63.472
TOTAL		96.123	100		96.123
-------	------	---------	---------	------	--------
ELMT	ZAF	%ELMT	ATOM.%		%OXIDE
SiK: 1	0.966	34.296	26.422	Si1O2	73.366
TiK: 1	0.898	0.187	0.084	Ti1O2	0.312
AlK: 1	0.968	6.139	4.924	Al2O3	11.599
CrK: 1	0.888	0	0	Cr2O3	0
FeK: 1	0.817	1.328	0.514	Fe1O1	1.708
MnK: 1	0.806	0.058	0.023	Mn1O1	0.075
MgK: 1	0.92	0.01	0.009	Mg1O1	0.016
CaK: 1	0.962	0.513	0.277	Ca1O1	0.718
NaK: 1	0.944	1.831	1.723	Na2O1	2.468
K K: 1	0.992	4.745	2.626	K 2O1	5.716
O K: 1	0	46.872	63.397
TOTAL		95.978	100		95.978
-------	------	---------	---------	------	--------
ELMT	ZAF	%ELMT	ATOM.%		%OXIDE
SiK: 1	0.966	34.37	26.41	Si1O2	73.524
TiK: 1	0.898	0.182	0.082	Ti1O2	0.304
AlK: 1	0.968	6.207	4.966	Al2O3	11.728
CrK: 1	0.887	0	0	Cr2O3	0
FeK: 1	0.817	1.162	0.449	Fe1O1	1.495
MnK: 1	0.806	0.119	0.047	Mn1O1	0.153
MgK: 1	0.92	0	0	Mg1O1	0
CaK: 1	0.961	0.455	0.245	Ca1O1	0.636
NaK: 1	0.946	1.854	1.74	Na2O1	2.499
K K: 1	0.992	4.854	2.679	K 2O1	5.847
O K: 1	0	46.984	63.382
TOTAL		96.186	100		96.186
-------	------	---------	---------	------	--------
ELMT	ZAF	%ELMT	ATOM.%		%OXIDE
SiK: 1	0.966	34.4	26.441	Si1O2	73.588
TiK: 1	0.898	0.246	0.111	Ti1O2	0.41
AlK: 1	0.967	6.028	4.824	Al2O3	11.39
CrK: 1	0.888	0	0	Cr2O3	0
FeK: 1	0.817	1.317	0.509	Fe1O1	1.695
MnK: 1	0.806	0.087	0.034	Mn1O1	0.113
MgK: 1	0.918	0.054	0.048	Mg1O1	0.089
CaK: 1	0.962	0.473	0.255	Ca1O1	0.661
NaK: 1	0.945	1.995	1.874	Na2O1	2.69
K K: 1	0.992	4.565	2.521	K 2O1	5.5
O K: 1	0	46.97	63.383
TOTAL		96.135	100		96.135
-------	------	---------	---------	------	--------
ELMT	ZAF	%ELMT	ATOM.%		%OXIDE
SiK: 1	0.967	34.519	26.507	Si1O2	73.843
TiK: 1	0.898	0.138	0.062	Ti1O2	0.229
AlK: 1	0.968	5.974	4.776	Al2O3	11.287
CrK: 1	0.889	0	0	Cr2O3	0
FeK: 1	0.817	1.451	0.56	Fe1O1	1.867
MnK: 1	0.806	0.101	0.04	Mn1O1	0.13
MgK: 1	0.919	0	0	Mg1O1	0
CaK: 1	0.961	0.548	0.295	Ca1O1	0.766
NaK: 1	0.942	1.742	1.634	Na2O1	2.348
K K: 1	0.993	4.972	2.743	K 2O1	5.989
O K: 1	0	47.016	63.384
TOTAL		96.46	100		96.46
-------	------	---------	---------	------	--------
ELMT	ZAF	%ELMT	ATOM.%		%OXIDE
SiK: 1	0.967	34.559	26.576	Si1O2	73.929
TiK: 1	0.898	0.179	0.081	Ti1O2	0.299
AlK: 1	0.969	5.968	4.778	Al2O3	11.277
CrK: 1	0.888	0	0	Cr2O3	0
FeK: 1	0.817	1.424	0.551	Fe1O1	1.832
MnK: 1	0.806	0.037	0.014	Mn1O1	0.047
MgK: 1	0.92	0	0	Mg1O1	0
CaK: 1	0.961	0.449	0.242	Ca1O1	0.628
NaK: 1	0.943	1.642	1.542	Na2O1	2.213
K K: 1	0.993	5.016	2.771	K 2O1	6.043
O K: 1	0	46.994	63.444
TOTAL		96.269	100		96.269
-------	------	---------	---------	------	--------
ELMT	ZAF	%ELMT	ATOM.%		%OXIDE
SiK: 1	0.966	34.359	26.537	Si1O2	73.5
TiK: 1	0.898	0.23	0.104	Ti1O2	0.383
AlK: 1	0.968	6.039	4.856	Al2O3	11.412
CrK: 1	0.887	0.015	0.006	Cr2O3	0.021
FeK: 1	0.817	1.177	0.457	Fe1O1	1.514
MnK: 1	0.805	0.031	0.012	Mn1O1	0.039
MgK: 1	0.92	0	0	Mg1O1	0
CaK: 1	0.961	0.368	0.199	Ca1O1	0.514
NaK: 1	0.947	1.969	1.858	Na2O1	2.654
K K: 1	0.992	4.564	2.532	K 2O1	5.498
O K: 1	0	46.785	63.438
TOTAL		95.536	100		95.536
-------	------	---------	---------	------	--------
ELMT	ZAF	%ELMT	ATOM.%		%OXIDE
SiK: 1	0.966	34.456	26.508	Si1O2	73.709
TiK: 1	0.898	0.087	0.039	Ti1O2	0.145
AlK: 1	0.968	6.087	4.875	Al2O3	11.501
CrK: 1	0.888	0.039	0.016	Cr2O3	0.056
FeK: 1	0.817	1.353	0.523	Fe1O1	1.74
MnK: 1	0.806	0	0	Mn1O1	0
MgK: 1	0.919	0.002	0.002	Mg1O1	0.003
CaK: 1	0.961	0.404	0.218	Ca1O1	0.565
NaK: 1	0.946	1.962	1.844	Na2O1	2.644
K K: 1	0.992	4.677	2.585	K 2O1	5.634
O K: 1	0	46.932	63.389
TOTAL		95.997	100		95.997
-------	------	---------	---------	------	--------
ELMT	ZAF	%ELMT	ATOM.%		%OXIDE
SiK: 1	0.967	34.497	26.534	Si1O2	73.795
TiK: 1	0.898	0.195	0.088	Ti1O2	0.325
AlK: 1	0.969	6.037	4.835	Al2O3	11.408
CrK: 1	0.888	0	0	Cr2O3	0
FeK: 1	0.817	1.332	0.515	Fe1O1	1.714
MnK: 1	0.806	0.025	0.01	Mn1O1	0.033
MgK: 1	0.921	0.011	0.01	Mg1O1	0.018
CaK: 1	0.961	0.459	0.247	Ca1O1	0.642
NaK: 1	0.944	1.695	1.593	Na2O1	2.285
K K: 1	0.992	4.938	2.729	K 2O1	5.949
O K: 1	0	46.978	63.439
TOTAL		96.167	100		96.167
-------	------	---------	---------	------	--------
ELMT	ZAF	%ELMT	ATOM.%		%OXIDE
SiK: 1	0.964	33.63	26.071	Si1O2	71.941
TiK: 1	0.899	0.32	0.145	Ti1O2	0.534
AlK: 1	0.964	6.129	4.946	Al2O3	11.58
CrK: 1	0.89	0	0	Cr2O3	0
FeK: 1	0.818	1.846	0.72	Fe1O1	2.375
MnK: 1	0.807	0.059	0.023	Mn1O1	0.076
MgK: 1	0.915	0.027	0.024	Mg1O1	0.045
CaK: 1	0.963	0.594	0.323	Ca1O1	0.831
NaK: 1	0.938	1.93	1.828	Na2O1	2.601
K K: 1	0.994	4.864	2.709	K 2O1	5.859
O K: 1	0	46.444	63.211
TOTAL		95.843	100		95.843
-------	------	---------	---------	------	--------
ELMT	ZAF	%ELMT	ATOM.%		%OXIDE
SiK: 1	0.963	33.888	26.077	Si1O2	72.493
TiK: 1	0.899	0.19	0.086	Ti1O2	0.317
AlK: 1	0.965	6.318	5.062	Al2O3	11.939
CrK: 1	0.89	0	0	Cr2O3	0
FeK: 1	0.818	1.791	0.693	Fe1O1	2.304
MnK: 1	0.806	0.015	0.006	Mn1O1	0.019
MgK: 1	0.916	0.071	0.063	Mg1O1	0.118
CaK: 1	0.963	0.598	0.322	Ca1O1	0.836
NaK: 1	0.94	1.945	1.828	Na2O1	2.622
K K: 1	0.994	4.758	2.63	K 2O1	5.731
O K: 1	0	46.805	63.232
TOTAL		96.379	100		96.379
-------	------	---------	---------	------	--------
ELMT	ZAF	%ELMT	ATOM.%		%OXIDE
SiK: 1	0.964	33.848	26.088	Si1O2	72.408
TiK: 1	0.899	0.233	0.105	Ti1O2	0.388
AlK: 1	0.966	6.23	4.999	Al2O3	11.771
CrK: 1	0.89	0	0	Cr2O3	0
FeK: 1	0.818	1.782	0.691	Fe1O1	2.292
MnK: 1	0.806	0.002	0.001	Mn1O1	0.003
MgK: 1	0.917	0.097	0.087	Mg1O1	0.161
CaK: 1	0.962	0.709	0.383	Ca1O1	0.993
NaK: 1	0.939	1.669	1.571	Na2O1	2.249
K K: 1	0.994	5.11	2.829	K 2O1	6.155
O K: 1	0	46.741	63.246
TOTAL		96.421	100		96.421
-------	------	---------	---------	------	--------
ELMT	ZAF	%ELMT	ATOM.%		%OXIDE
SiK: 1	0.963	33.933	26.066	Si1O2	72.589
TiK: 1	0.899	0.254	0.114	Ti1O2	0.423
AlK: 1	0.964	6.268	5.013	Al2O3	11.843
CrK: 1	0.889	0.084	0.035	Cr2O3	0.123
FeK: 1	0.818	1.628	0.629	Fe1O1	2.094
MnK: 1	0.806	0	0	Mn1O1	0
MgK: 1	0.916	0.104	0.092	Mg1O1	0.172
CaK: 1	0.963	0.69	0.372	Ca1O1	0.966
NaK: 1	0.941	2.006	1.883	Na2O1	2.704
K K: 1	0.994	4.626	2.553	K 2O1	5.573
O K: 1	0	46.894	63.243
TOTAL		96.487	100		96.486
-------	------	---------	---------	------	--------
ELMT	ZAF	%ELMT	ATOM.%		%OXIDE
SiK: 1	0.964	34.276	26.177	Si1O2	73.323
TiK: 1	0.898	0.262	0.117	Ti1O2	0.437
AlK: 1	0.966	6.316	5.022	Al2O3	11.934
CrK: 1	0.889	0	0	Cr2O3	0
FeK: 1	0.817	1.531	0.588	Fe1O1	1.97
MnK: 1	0.806	0	0	Mn1O1	0
MgK: 1	0.918	0.09	0.08	Mg1O1	0.15
CaK: 1	0.962	0.58	0.31	Ca1O1	0.811
NaK: 1	0.943	1.856	1.732	Na2O1	2.501
K K: 1	0.993	4.87	2.672	K 2O1	5.866
O K: 1	0	47.211	63.302
TOTAL		96.991	100		96.991
-------	------	---------	---------	------	--------
ELMT	ZAF	%ELMT	ATOM.%		%OXIDE
SiK: 1	0.965	34.184	26.066	Si1O2	73.126
TiK: 1	0.898	0.262	0.117	Ti1O2	0.436
AlK: 1	0.966	6.309	5.008	Al2O3	11.92
CrK: 1	0.889	0	0	Cr2O3	0
FeK: 1	0.818	1.577	0.605	Fe1O1	2.029
MnK: 1	0.806	0.046	0.018	Mn1O1	0.059
MgK: 1	0.918	0.09	0.079	Mg1O1	0.149
CaK: 1	0.962	0.757	0.405	Ca1O1	1.059
NaK: 1	0.941	1.751	1.631	Na2O1	2.36
K K: 1	0.994	5.198	2.848	K 2O1	6.262
O K: 1	0	47.228	63.224
TOTAL		97.4	100		97.4
-------	------	---------	---------	------	--------
ELMT	ZAF	%ELMT	ATOM.%		%OXIDE
SiK: 1	0.965	34.146	26.238	Si1O2	73.045
TiK: 1	0.898	0.258	0.116	Ti1O2	0.431
AlK: 1	0.967	6.181	4.945	Al2O3	11.679
CrK: 1	0.889	0.013	0.005	Cr2O3	0.019
FeK: 1	0.818	1.566	0.605	Fe1O1	2.014
MnK: 1	0.806	0	0	Mn1O1	0
MgK: 1	0.918	0.067	0.06	Mg1O1	0.112
CaK: 1	0.962	0.616	0.332	Ca1O1	0.862
NaK: 1	0.941	1.749	1.642	Na2O1	2.358
K K: 1	0.993	4.96	2.738	K 2O1	5.974
O K: 1	0	46.938	63.32
TOTAL		96.493	100		96.493
-------	------	---------	---------	------	--------
ELMT	ZAF	%ELMT	ATOM.%		%OXIDE
SiK: 1	0.964	33.905	26.057	Si1O2	72.53
TiK: 1	0.899	0.266	0.12	Ti1O2	0.444
AlK: 1	0.965	6.269	5.016	Al2O3	11.845
CrK: 1	0.89	0	0	Cr2O3	0
FeK: 1	0.818	1.704	0.659	Fe1O1	2.192
MnK: 1	0.806	0.052	0.02	Mn1O1	0.067
MgK: 1	0.916	0.069	0.061	Mg1O1	0.114
CaK: 1	0.963	0.686	0.369	Ca1O1	0.96
NaK: 1	0.94	1.944	1.826	Na2O1	2.621
K K: 1	0.994	4.798	2.649	K 2O1	5.779
O K: 1	0	46.86	63.224
TOTAL		96.553	100		96.553
-------	------	---------	---------	------	--------
ELMT	ZAF	%ELMT	ATOM.%		%OXIDE
SiK: 1	0.963	33.931	25.967	Si1O2	72.585
TiK: 1	0.9	0.305	0.137	Ti1O2	0.509
AlK: 1	0.964	6.322	5.037	Al2O3	11.946
CrK: 1	0.891	0	0	Cr2O3	0
FeK: 1	0.818	1.938	0.746	Fe1O1	2.493
MnK: 1	0.807	0.107	0.042	Mn1O1	0.139
MgK: 1	0.916	0.114	0.101	Mg1O1	0.19
CaK: 1	0.963	0.752	0.404	Ca1O1	1.053
NaK: 1	0.936	1.731	1.618	Na2O1	2.333
K K: 1	0.995	4.952	2.722	K 2O1	5.965
O K: 1	0	47.059	63.226
TOTAL		97.211	100		97.211
-------	------	---------	---------	------	--------
